# Supplementary material for: Transition metal induced derivatisations resulting in novel coordination behaviour of bis(oxamato) ligands
Source: Royal Society of Chemistry journal article supplement (doi:10.1039/b804382e), 2008-01-01
Supplement: b804382e.pdf [file b804382e.pdf]

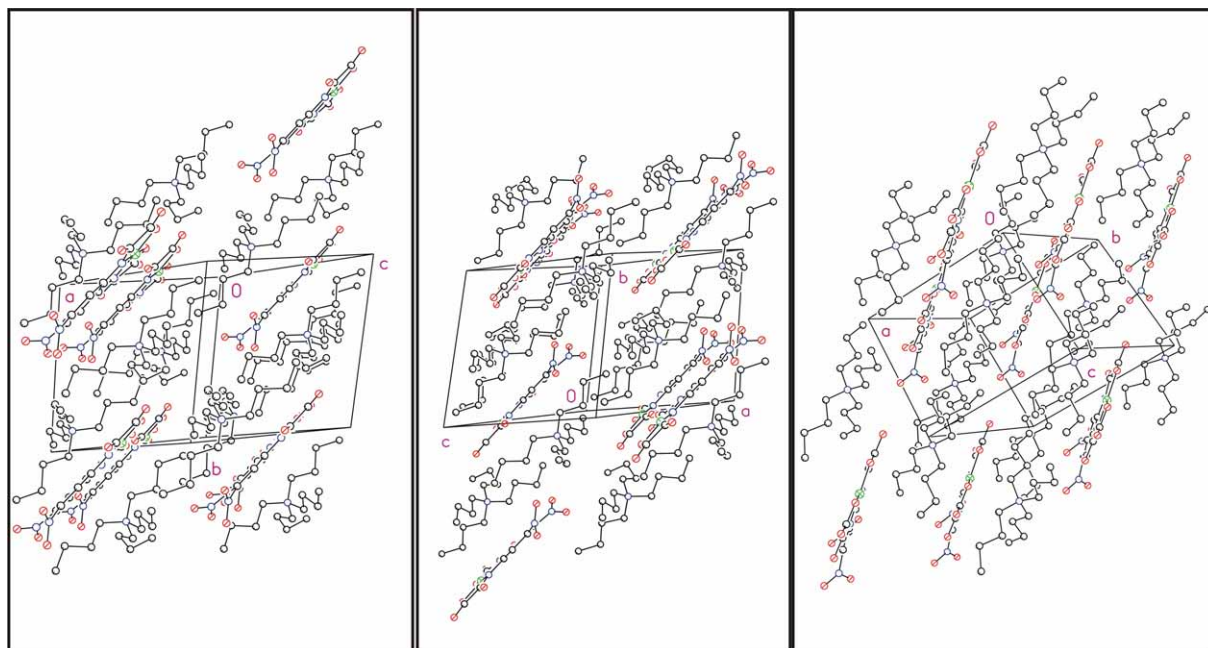

S1.

S2.

S3.

**Figures S1 - S3.** Packing of complex **2** in the solid state in different views illustrating the arrangement of  $[\text{Ni}(2,3\text{-acbo})]^{2-}$  anions in one layer with the  $[\text{ᵐBu}_4\text{N}]^+$  cations as spacers inbetween.

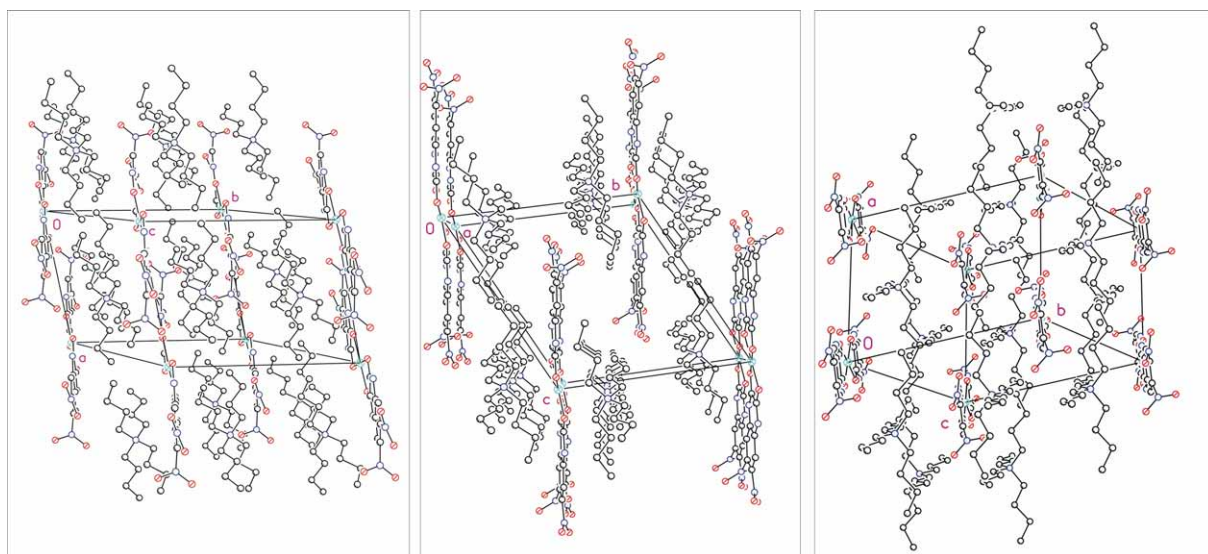

S4.

S5.

S6.

**Figures S4 – S6.** Packing of complex **3** in the solid state in different views illustrating the arrangement of  $[\text{Cu}(2,3\text{-acbo})]^{2-}$  anions in one layer with the  $[\text{ᵐBu}_4\text{N}]^+$  cations as spacers inbetween.

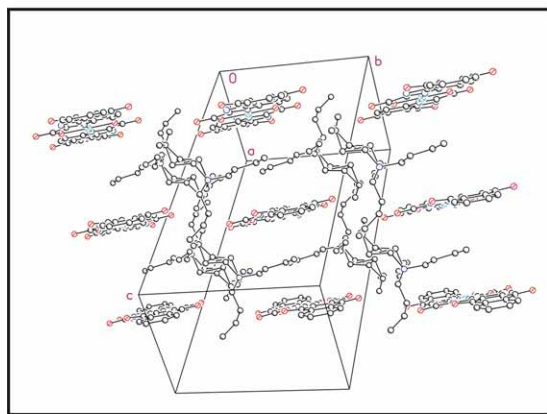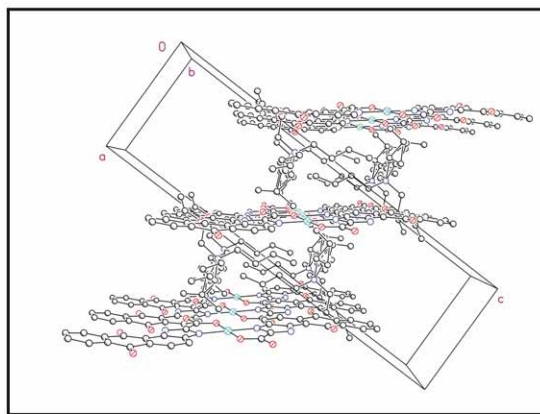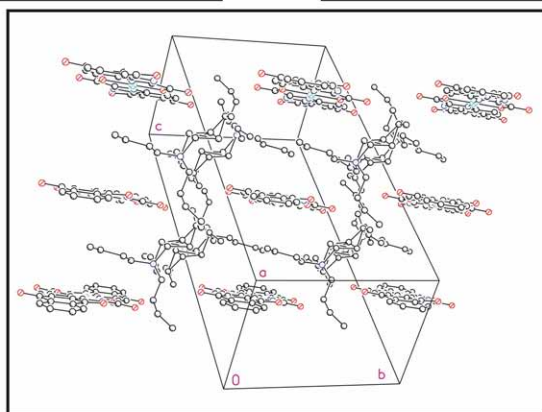

S7.

S8.

S9.

Figures S7 – S9. Packing of complex **6** in the solid state in different views illustrating the arrangement of  $[\text{Cu}(\text{aibo})_2]^{2-}$  anions in one layer with the  $[\text{nBu}_4\text{N}]^+$  cations as spacers inbetween.

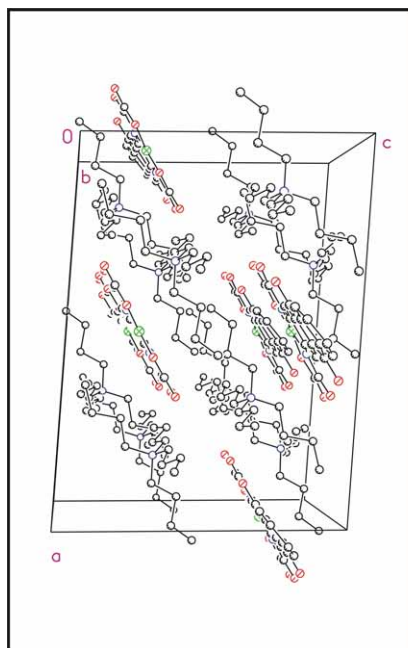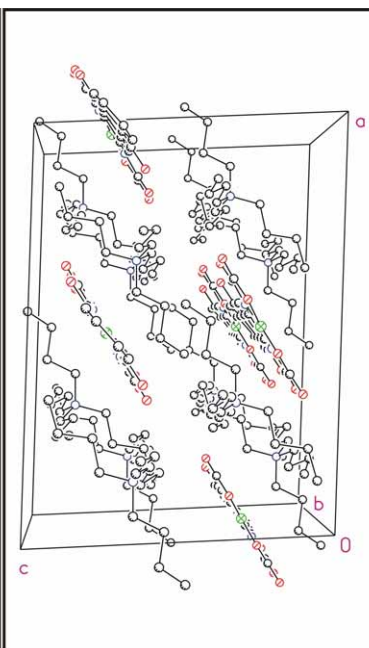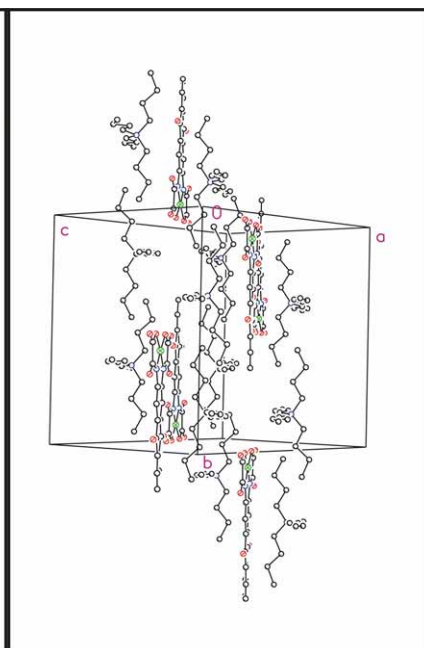

S10.

S11.

S12.

Figures S10 – S12. Packing of complex **8** in the solid state in different views illustrating the arrangement of  $[\text{Ni}(\text{nibo})_2]^{2-}$  anions in one layer with the  $[\text{nBu}_4\text{N}]^+$  cations as spacers inbetween.

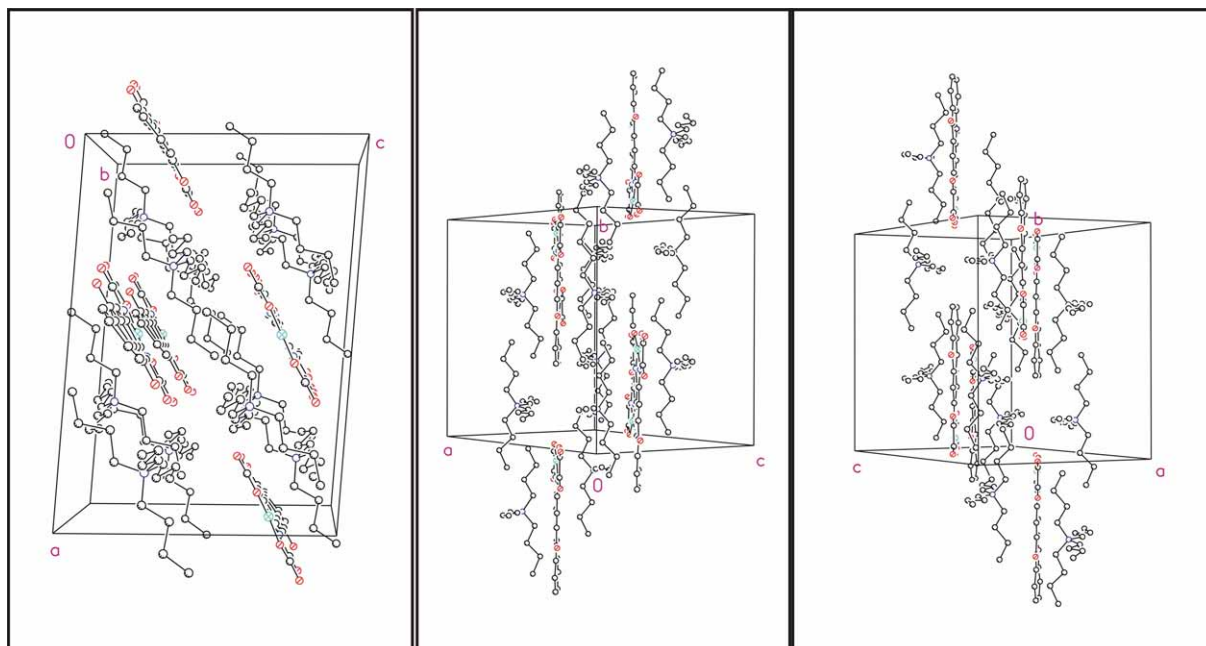

S13.

S14.

S15.

Figures S13 – S15. Packing of complex **9** in the solid state in different views illustrating the arrangement of  $[\text{Cu}(\text{niqo})_2]^{2-}$  anions in one layer with the  $[\text{tBu}_4\text{N}]^+$  cations as spacers inbetween.

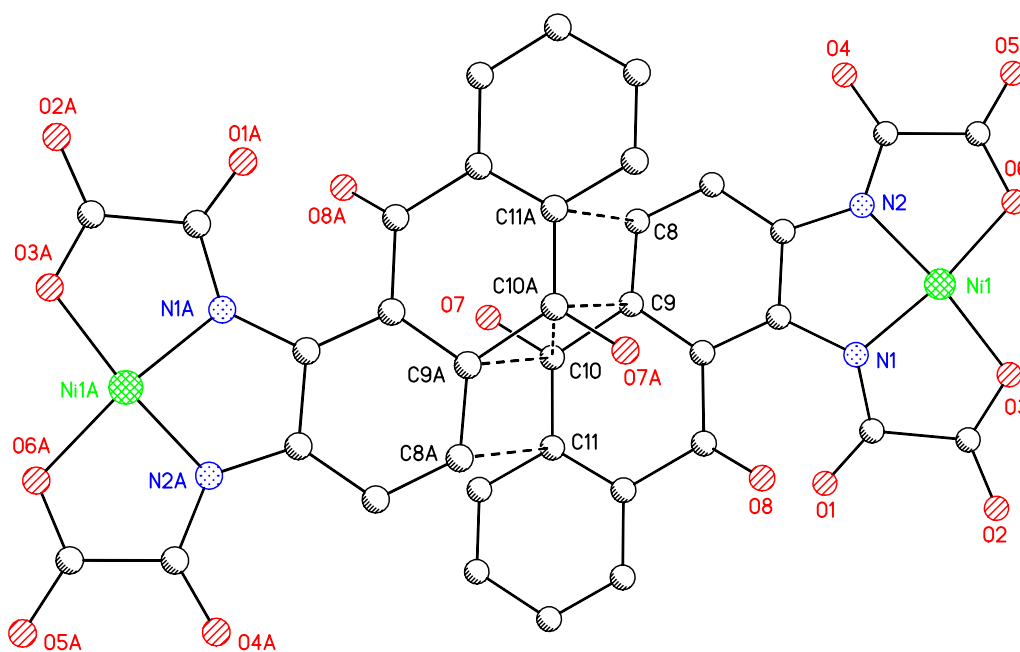

Figure S16. Illustration of the  $\pi\pi$  interaction of two  $[\text{Ni}(1,2\text{-acbo})]^{2-}$  anions of **5** in the solid state. Dotted lines refers to C–C distances below 3.6 Å, with  $d(\text{C}8\text{--C}11\text{A}) = 3.59$  Å,  $d(\text{C}9\text{--C}10\text{A}) = 3.46$  Å and  $d(\text{C}10\text{--C}10\text{A}) = 3.28$  Å. Disordered atoms have been omitted for clarity.

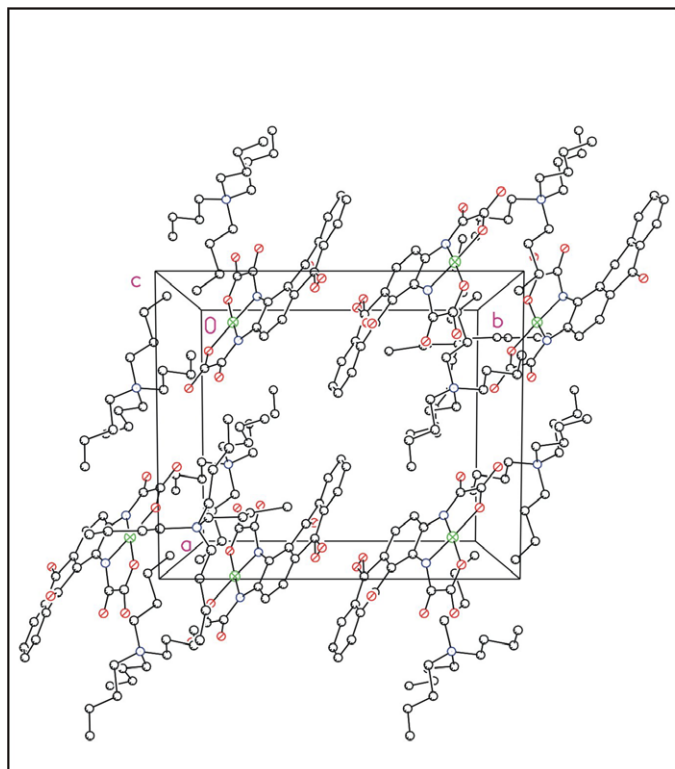

S17.

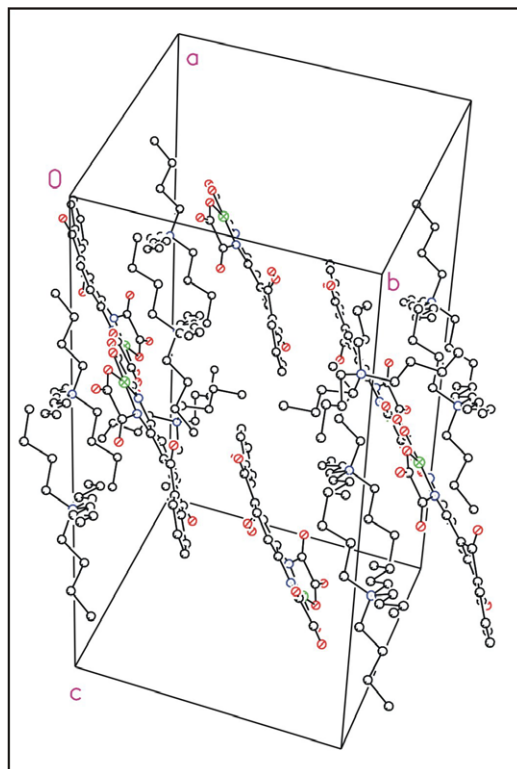

S18.

Figures S17 – S18. Packing of complex **9** in the solid state in different views illustrating the arrangement of  $[\text{Ni}(1,2\text{-acbo})]^{2-}$  anions in one layer with the  $[\text{nBu}_4\text{N}]^+$  cations as spacers inbetween. Disordered atoms have been omitted.

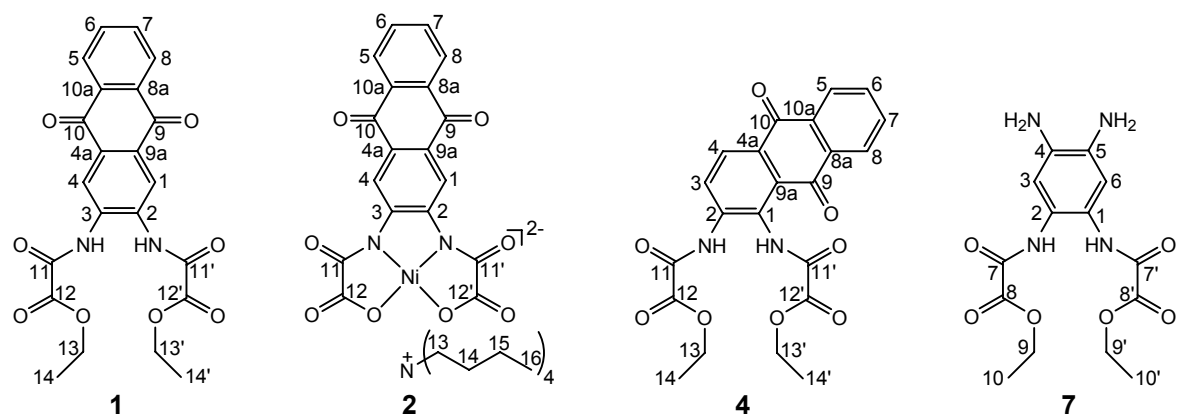

Figure S19. The atomic numbering scheme for **1**, **2**, **4**, and **7**.
